# Supplementary material
Source: MDPI journal article supplement (https://www.mdpi.com/2410-3888/8/3/165)
Supplement: s1 [file s1]

# Complete Mitochondrial Genome and Phylogenetic Position of *Chirolophis wui* (Perciformes: Stichaeidae)

## Supplimentary materials:

**Table S1.** Summary of *Chirolophis wui* mitogenome data produced/ stats during de novo assembly analysis in Illumina platform using SPAdes 3.13.0 assembly method.

| Library             | Total read bases | Total reads | GC (%) | Q20 (%) | Q30 (%) |
|---------------------|------------------|-------------|--------|---------|---------|
| Raw data stats      | 20,532,509,182   | 135,976,882 | 42.52  | 96.81   | 92.82   |
| Filtered data stats | 17,023,391,930   | 113,148,222 | 41.97  | 99.18   | 97.14   |

**Table S2.** *Chirolophis wui* mitogenome overall self-mapping stats.

| Library                    | Total read bases | Mapped reads   | Coverage (%) | Depth  | Insert size (std.) |
|----------------------------|------------------|----------------|--------------|--------|--------------------|
| Overall self-mapping stats | 113,148,222      | 79,038 (0.07%) | 100.00       | 678.57 | 445.40 (101.31)    |

(Coverage (%): The percentage of mapped sites ( $\geq 1\times$ ). Depth: Average mapping depth. Insert size (Std.): The length between adapters and the standard deviation of predicted length.)
